# Supplementary material for: Elevated Levels of CTRP1 in Obesity Contribute to Tumor Progression in a p53-Dependent Manner
Source: MDPI journal article supplement (doi:10.3390/cancers13143619), 2021-07-19
Supplement: s1 [file s1]

# Supplementary Materials: Elevated Levels of CTRP1 in Obesity Contribute to Tumor Progression in A p53-Dependent Manner

Rackhyun Park, Minsu Jang, Yea-In Park, Yeonjeong Park, Sim Namkoong, Jin I. Lee and Junsoo Park

(kDa)

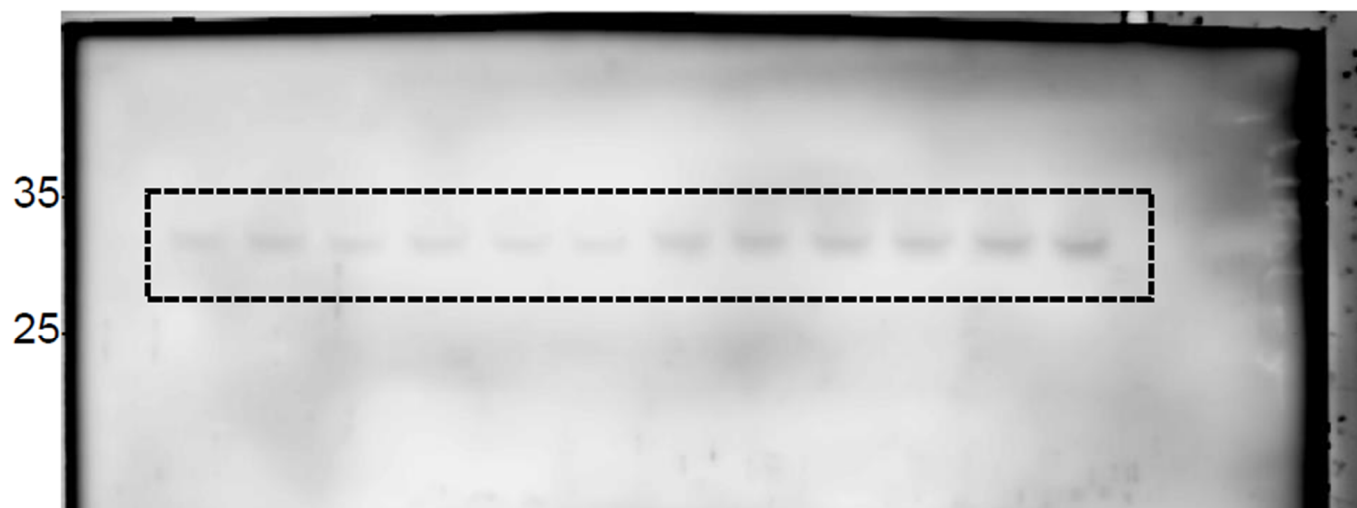

**Figure S1.** Uncropped western blots from Figure 1A. Uncropped western blot membranes, dotted lines indicate the cropped area used in Figure 1A western blot.

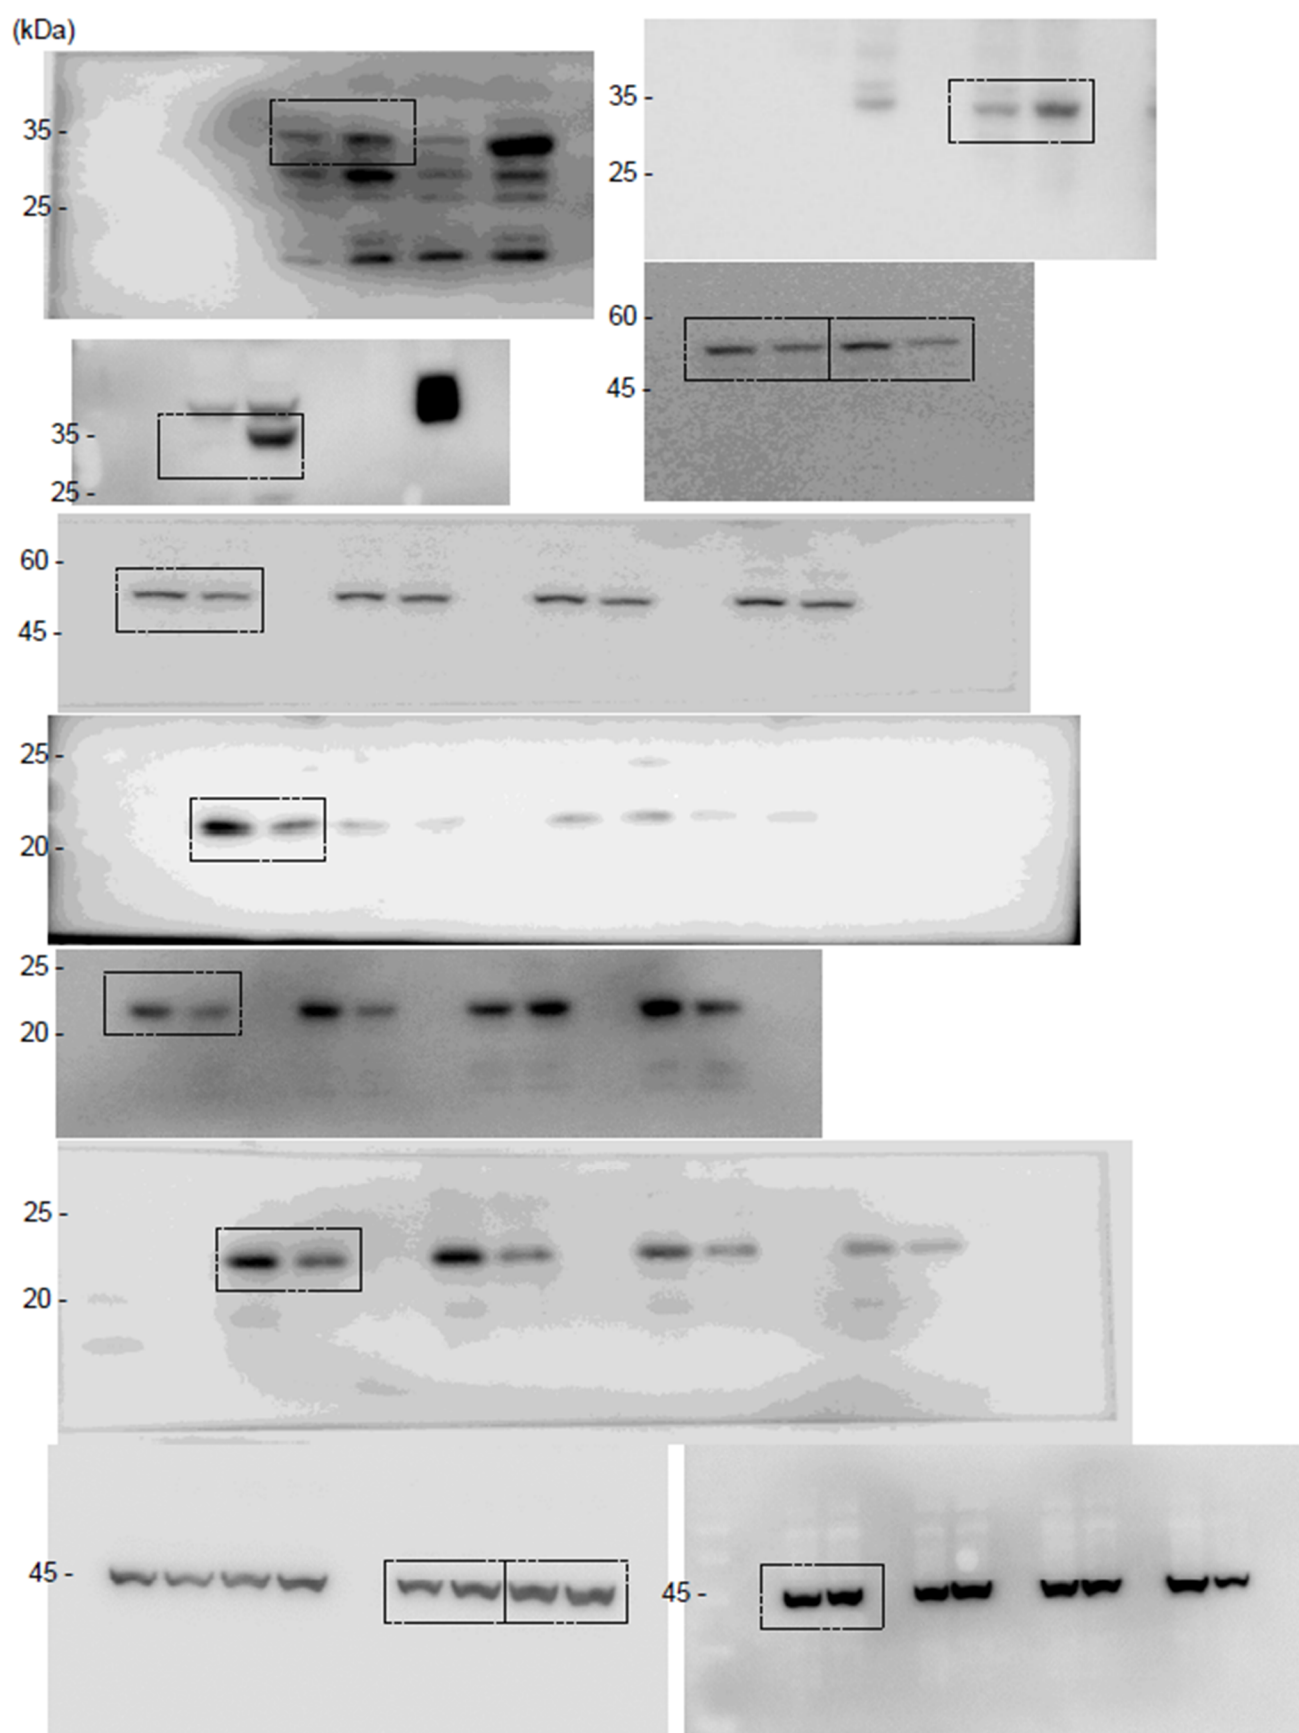

**Figure S2.** Uncropped western blots from Figure 2B. Uncropped western blot membranes, dotted lines indicate the cropped area used in Figure 2B western blot.

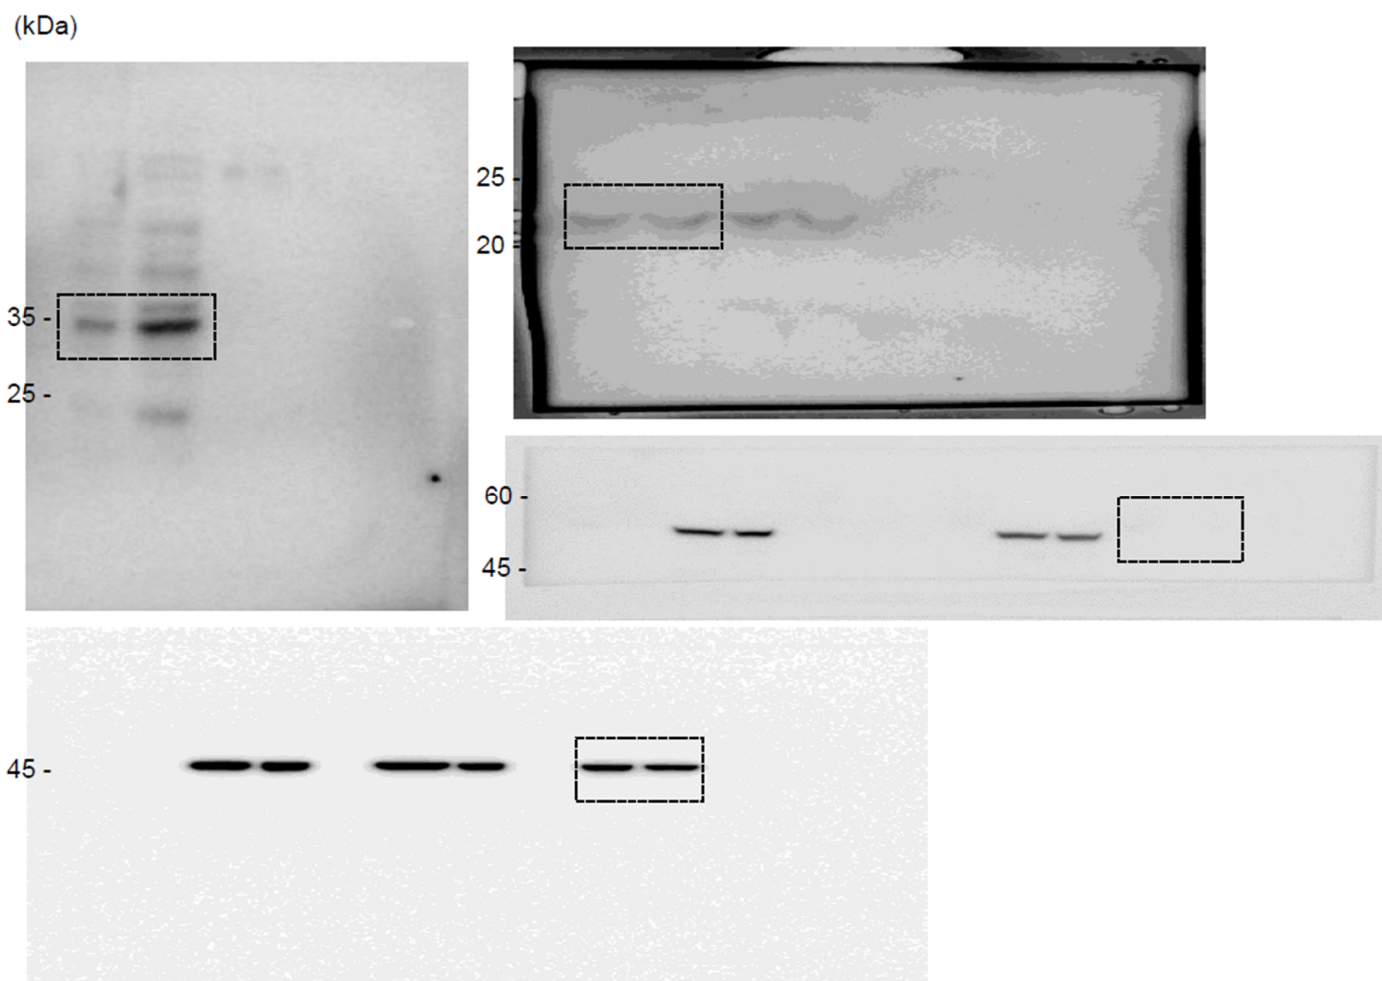

**Figure S3.** Uncropped western blots from Figure 3A. Uncropped western blot membranes, dotted lines indicate the cropped area used in Figure 3A western blot.

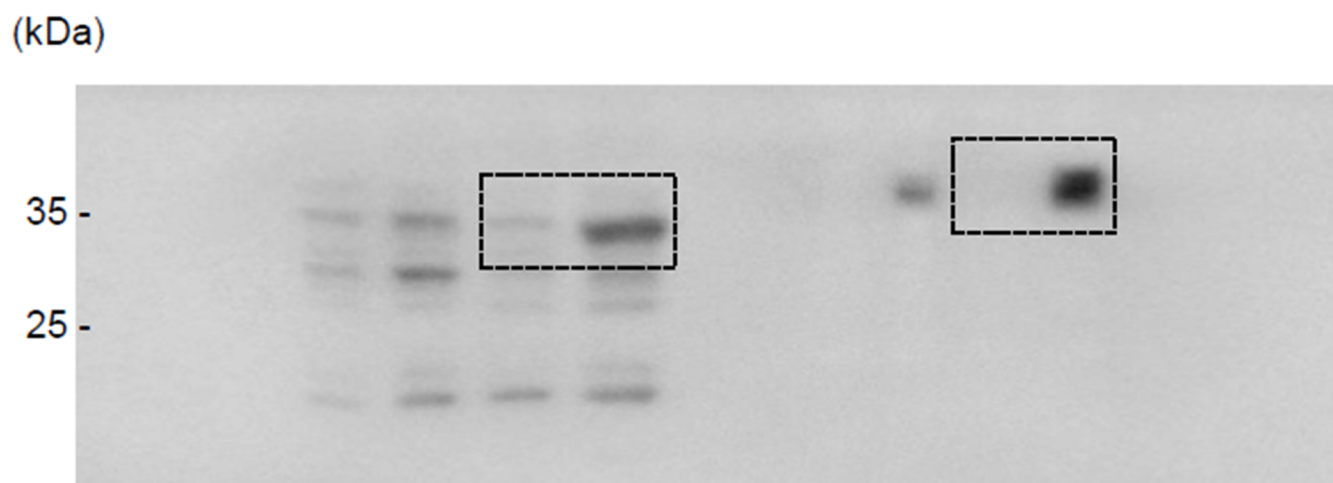

**Figure S4.** Uncropped western blots from Figure 4A. Uncropped western blot membranes, dotted lines indicate the cropped area used in Figure 4A western blot.

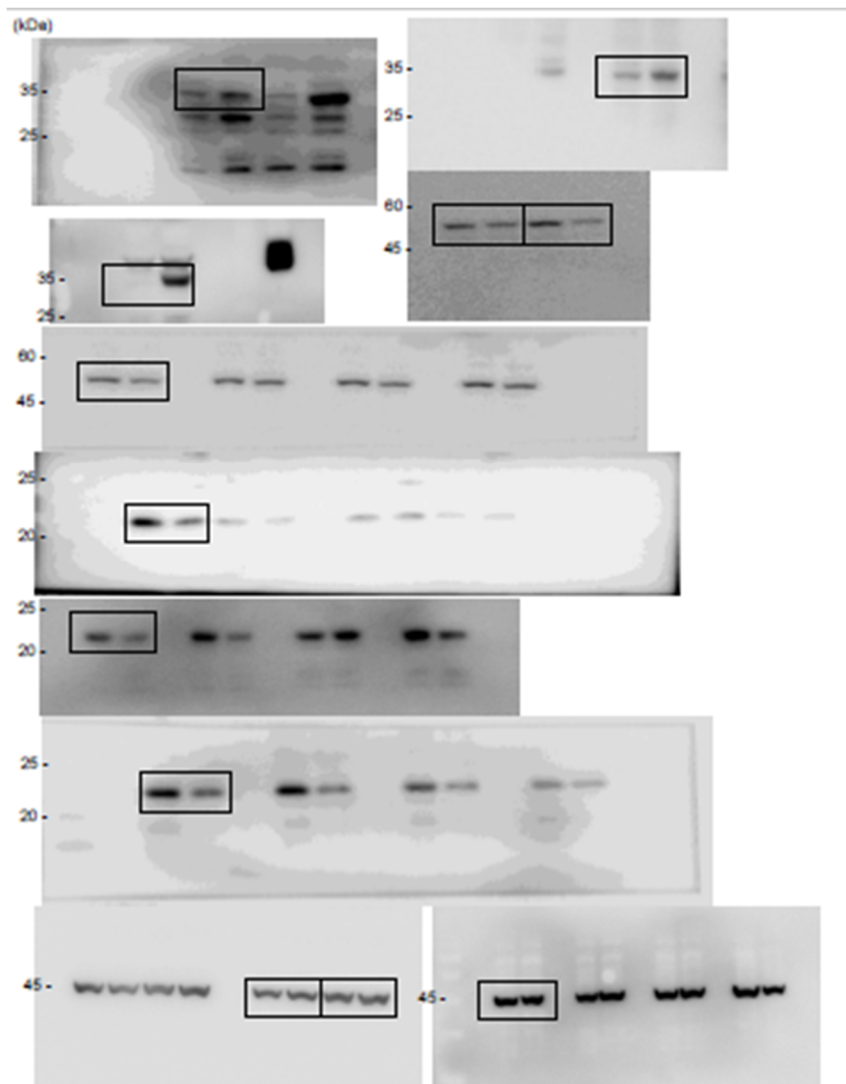

Figure S2. Uncropped western blots from Figure 2B. Uncropped western blot membranes, dotted lines indicate the cropped area used in Figure 2B western blot.

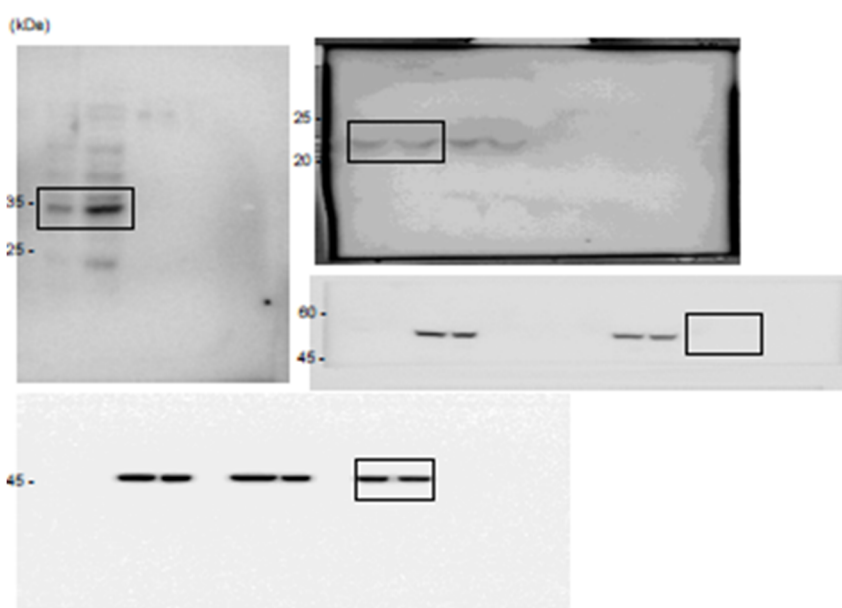

Figure S5. Uncropped western blots from Figure 4B. Uncropped western blot membranes, dotted lines indicate the cropped area used in Figure 4B western blot.
